# Supplementary material for: Lack of Benefit of Extending Temozolomide Treatment in Patients with High Vascular Glioblastoma with Methylated MGMT
Source: MDPI journal article supplement (doi:10.3390/cancers13215420), 2021-10-29
Supplement: s1 [file s1]

## Supporting Information

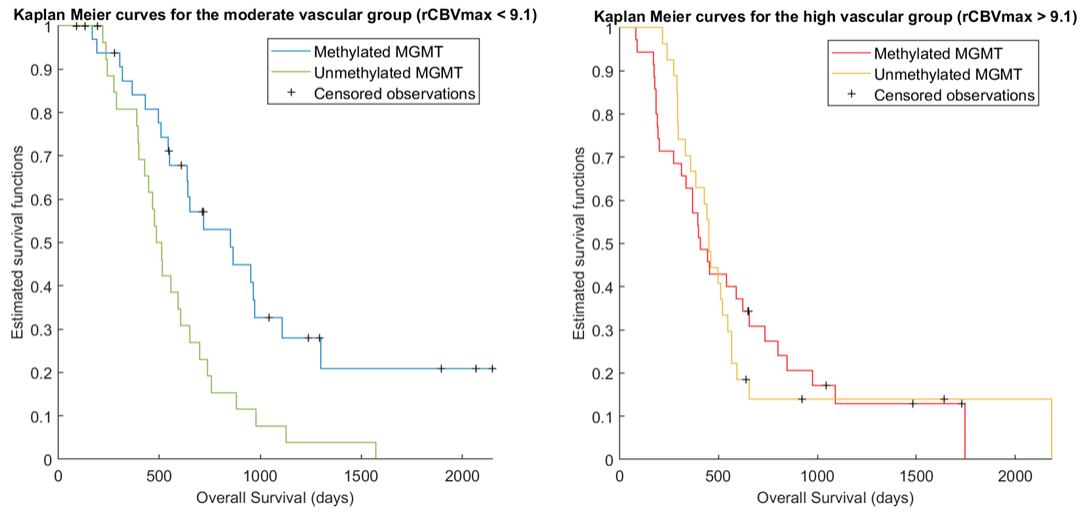

**Figure S.1A:** Kaplan Meier curves for the moderate vascular group (left) and for the high vascular group (right) depending on the *MGMT* methylation status. Vascular groups are defined by the threshold of the study cohort: median  $rCBV_{max}$  (th = 9.1).

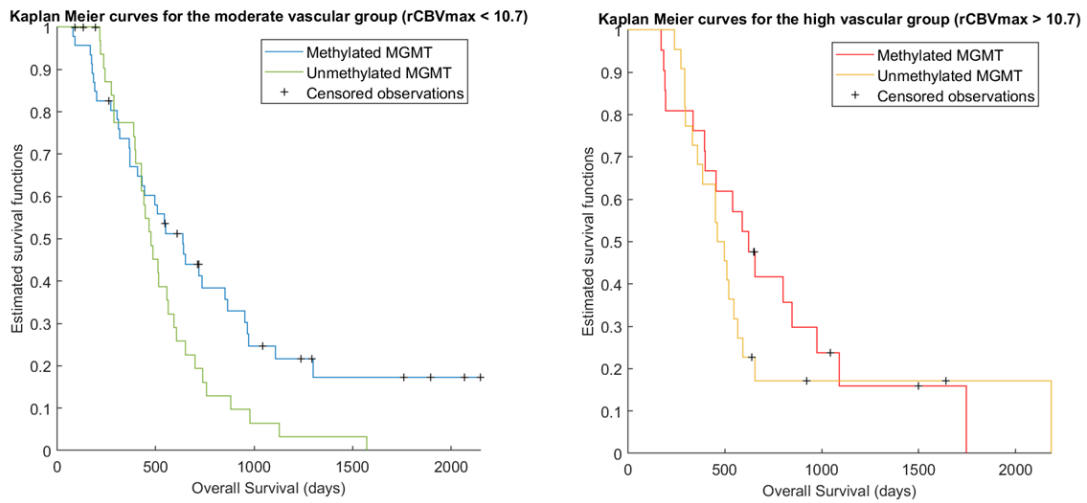

**Figure S.1B:** Kaplan Meier curves for the moderate vascular group (left) and for the high vascular group (right) depending on the *MGMT* methylation status. Vascular groups are defined by the threshold proposed in the previous study (49) (th = 10.7).
